# Supplementary material for: Improved sensitivity of UV sensors in hierarchically structured arrays of network-loaded ZnO nanorods via optimization techniques
Source: Royal Society of Chemistry journal article supplement (doi:10.1039/c7ra04773h), 2017-01-01
Supplement: c7ra04773h1.pdf [file c7ra04773h1.pdf]

# Improved sensitivity of UV sensors in hierarchically structured arrays of network-loaded ZnO nanorods via optimization techniques

Seyed Farshad Akhtarianfar<sup>a,d</sup>, Ali Khayatian<sup>b</sup>, Rouhollah Shakernejad<sup>b</sup>

Mohammad Almasi-Kashi<sup>a,b\*</sup>, Suck Won Hong<sup>c\*</sup>

<sup>a</sup> *Institute of Nanoscience and Nanotechnology, University of Kashan, Kashan 87317-51167, Iran*

<sup>b</sup> *Department of Physics, University of Kashan, Kashan 87317-51167, Iran. E-mail: almac@kashanu.ac.ir*

<sup>c</sup> *Department of Cogno-Mechatronics Engineering, Department of Optics and Mechatronics Engineering, Pusan National University (PNU), Busan 46241, Republic of Korea. E-mail: swhong@pusan.ac.kr*

<sup>d</sup> *Optomechatronics Research Institute, Pusan National University (PNU), Busan 46241, Republic of Korea*

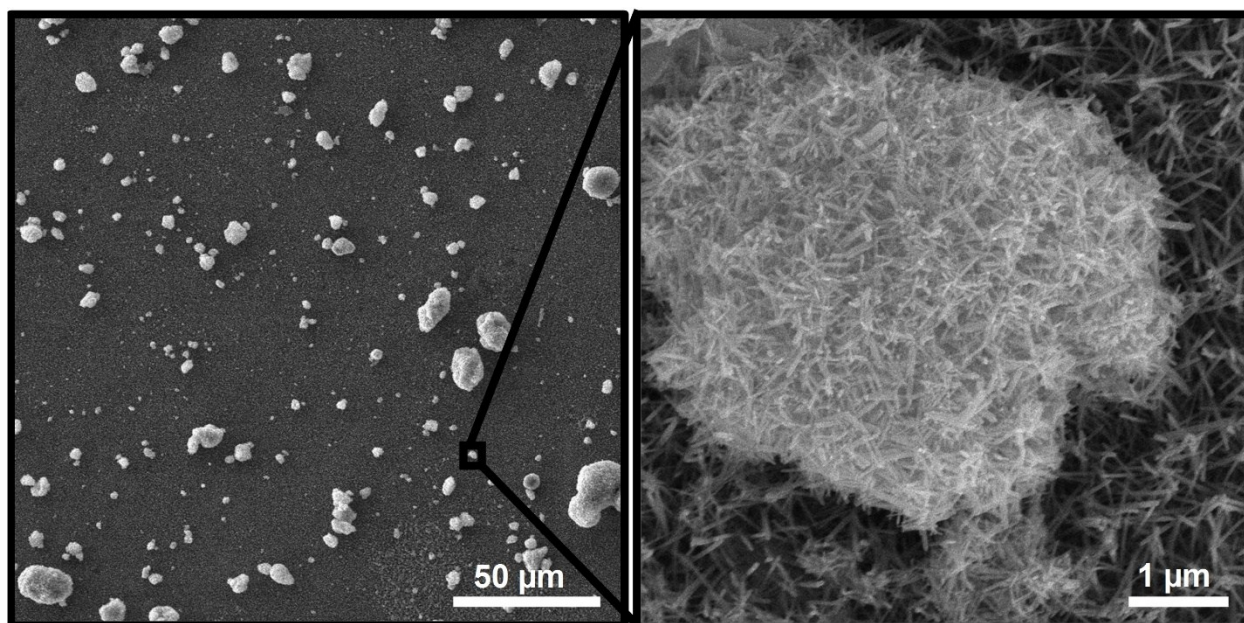

**Fig.S1.** SEM image secondary ZnO NRs dispersed on the firstly grown vertical ZnO NRs without the use of homogenizing pulse mode of ultrasonication for the preparation of ZnO colloidal solution. Unwanted highly agglomerated microparticels of ZnO NRs are shown in zoom-up image (right panel).

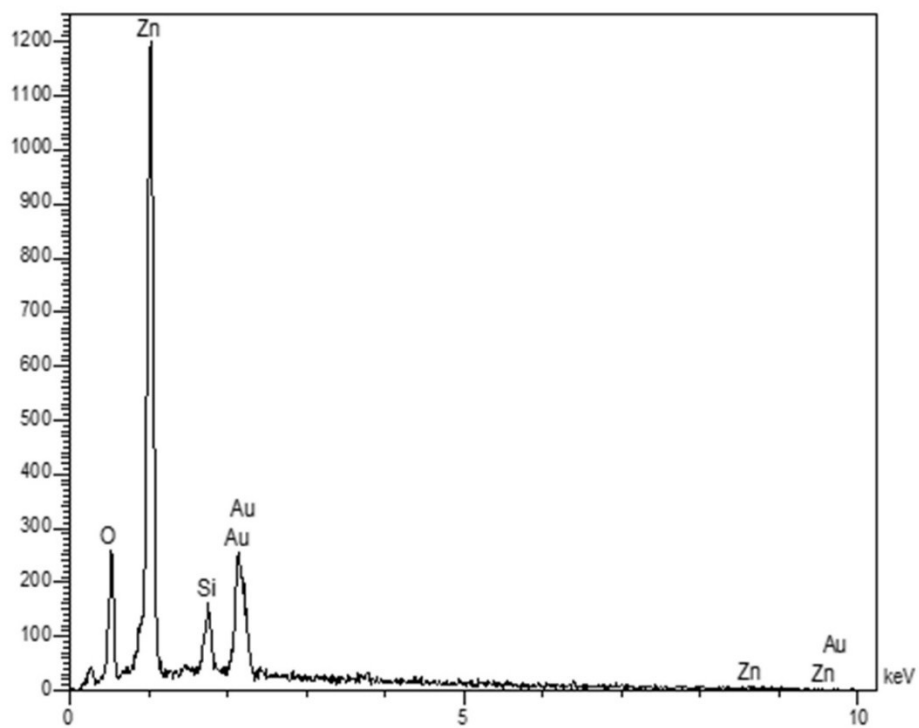

**Fig. S2.** EDS analysis of ZnO NRs. Different peaks related to oxygen, zinc, silicon, and gold atoms. Si and Au are the main elements of glass substrate and conductive layer, respectively.

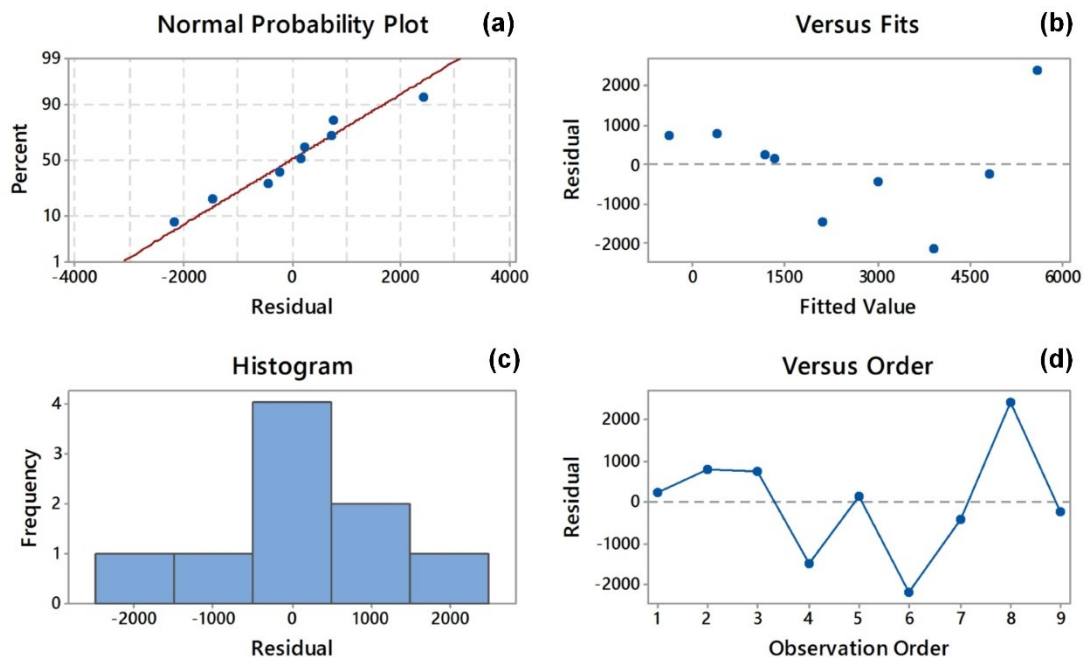

**Fig. S3.** Residual plots of the modelling used to optimize the sensitivity and responsivity of the UV sensor based on network-loaded ZnO NRs (a) normal probability plot, (b) residual versus fits, (c) residual histogram, and (d) residual versus observation order.

**Table S1.** ANOVA results acquired from regression analysis of taguchi experimental measurments.

| <b>Source</b>                             | <b>DF</b> | <b>Adj. SS</b> | <b>Adj. MS</b> | <b>F-Value</b> | <b>P-Value</b> |
|-------------------------------------------|-----------|----------------|----------------|----------------|----------------|
| <b>Regression</b>                         | 3         | 32974399       | 10991466       | 2.41           | 0.03           |
| <b>Concentration (mg ml<sup>-1</sup>)</b> | 1         | 24746968       | 24746968       | 7.32           | 0.047          |
| <b>Deposition cycles (No.)</b>            | 1         | 717996         | 717996         | 0.25           | 0.039          |
| <b>Deposition time (s)</b>                | 1         | 7509435        | 7509435        | 2.03           | 0.042          |
| <b>Error</b>                              | 5         | 14213581       | 2842716        |                |                |
| <b>Total</b>                              | 8         | 47187980       |                |                |                |

**Table S2:** Coded experiments, operating parameters, levels of experiments, and optimization factor for different experiments based on Taguchi method.

| Code of Sample                                     | Concentration (mg ml <sup>-1</sup> ) | Deposition Cycle (Number) | Deposition Time (s) | Optimization factor of Sensitivity & Responsivity (a.u.) | Selected for further analyses                     |
|----------------------------------------------------|--------------------------------------|---------------------------|---------------------|----------------------------------------------------------|---------------------------------------------------|
| C <sub>0.5</sub> DC <sub>1</sub> DT <sub>60</sub>  | 0.5                                  | 1                         | 60                  | 6866.2                                                   | No                                                |
| C <sub>0.5</sub> DC <sub>3</sub> DT <sub>180</sub> | 0.5                                  | 3                         | 180                 | 606.5                                                    | No                                                |
| C <sub>0.5</sub> DC <sub>5</sub> DT <sub>300</sub> | 0.5                                  | 5                         | 300                 | 1611.1                                                   | No                                                |
| C <sub>1.0</sub> DC <sub>1</sub> DT <sub>180</sub> | 1.0                                  | 1                         | 180                 | 518.3                                                    | No                                                |
| C <sub>1.0</sub> DC <sub>3</sub> DT <sub>300</sub> | 1.0                                  | 3                         | 300                 | 9511.2                                                   | No                                                |
| C <sub>1.0</sub> DC <sub>5</sub> DT <sub>60</sub>  | 1.0                                  | 5                         | 60                  | 6516.0                                                   | Yes<br>(denoted as <i>low performance</i> )       |
| C <sub>1.5</sub> DC <sub>1</sub> DT <sub>300</sub> | 1.5                                  | 1                         | 300                 | 3307.9                                                   | No                                                |
| C <sub>1.5</sub> DC <sub>3</sub> DT <sub>60</sub>  | 1.5                                  | 3                         | 60                  | 22401.1                                                  | Yes<br>(denoted as <i>optimized performance</i> ) |
| C <sub>1.5</sub> DC <sub>5</sub> DT <sub>180</sub> | 1.5                                  | 5                         | 180                 | 12859.5                                                  | Yes<br>(denoted as <i>med performance</i> )       |

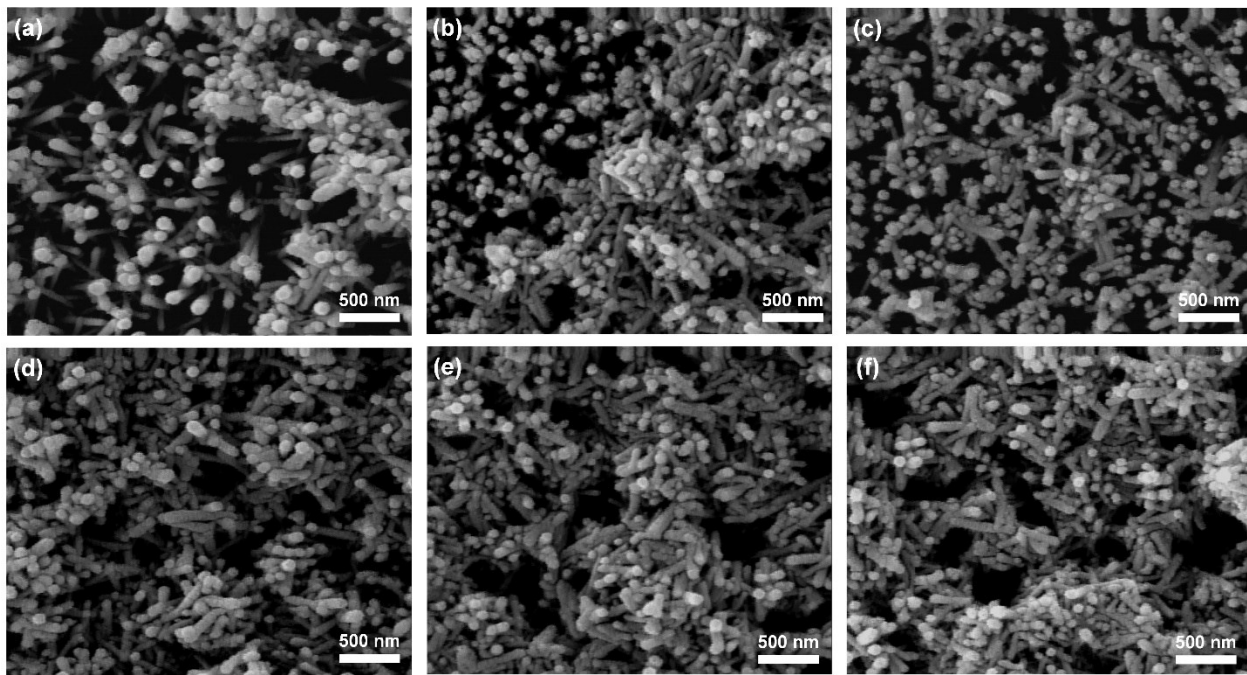

**Fig. S4.** Top-view SEM images of ZnO networks deposited over the first grown ZnO NRs showing (a) C<sub>0.5</sub>DC<sub>1</sub>DT<sub>60</sub>, (b) C<sub>0.5</sub>DC<sub>3</sub>DT<sub>180</sub>, (c) C<sub>1.0</sub>DC<sub>1</sub>DT<sub>180</sub>, (d) C<sub>0.5</sub>DC<sub>5</sub>DT<sub>300</sub>, (e) C<sub>1.0</sub>DC<sub>3</sub>DT<sub>300</sub>, and (f) C<sub>1.5</sub>DC<sub>1</sub>DT<sub>300</sub> samples.
